# Supplementary material for: Noncovalent titania wrapping of single-walled carbon nanotubes for environmentally stable transparent conductive thin films
Source: Royal Society of Chemistry journal article supplement (doi:10.1039/c0jm02059a), 2010-01-01
Supplement: c0jm02059a.pdf [file c0jm02059a.pdf]

Supporting Information

### Noncovalent Titania Wrapping of Single-Walled Carbon Nanotubes for Environmentally Stable Transparent Conductive Thin Films\*

*Joong Tark Han, Jun Suk Kim, Hae Deuk Jeong, Hee Jin Jeong, Seung Yol Jeong, and Geon-Woong Lee\**

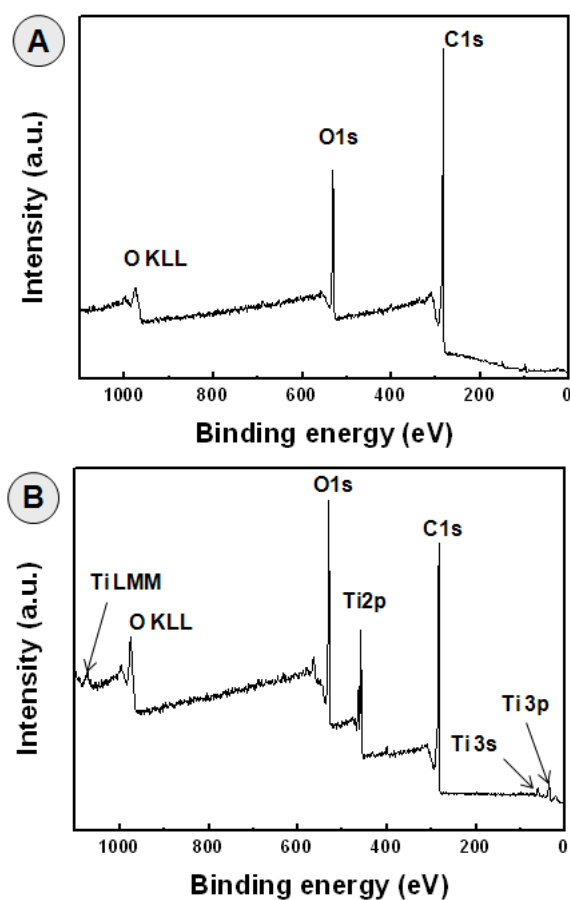

**Figure S1.** XPS spectra of (a) pristine P3 and (b) P3@TIP-acac films baked at 150 °C.

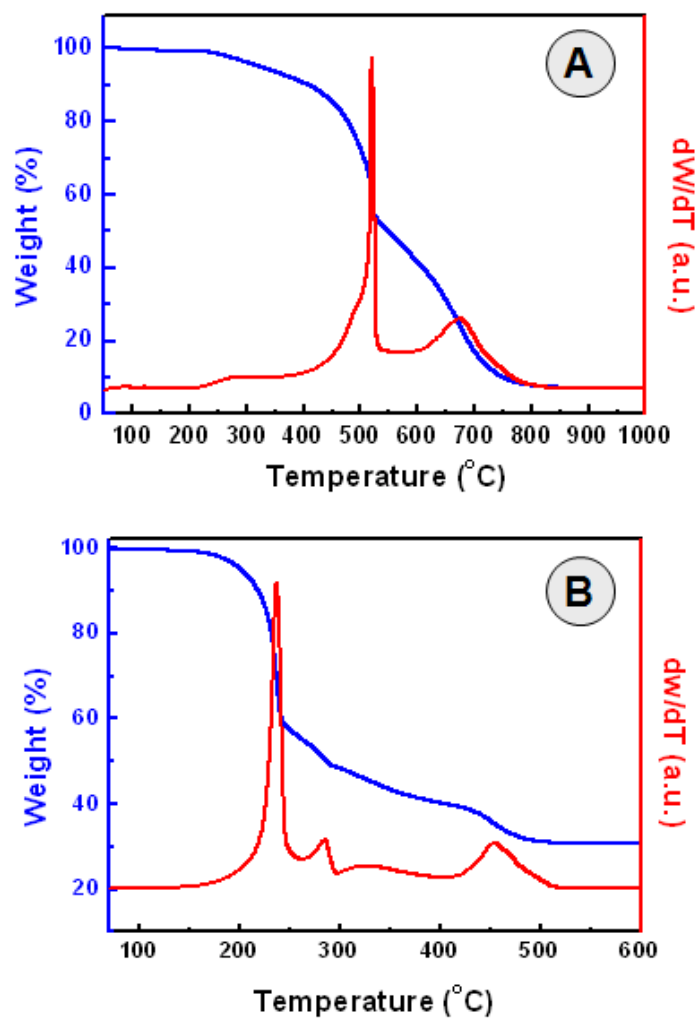

**Figure S2.** TGA data for (a) pristine P3, and (b) TIP/acac samples baked at 150 °C.

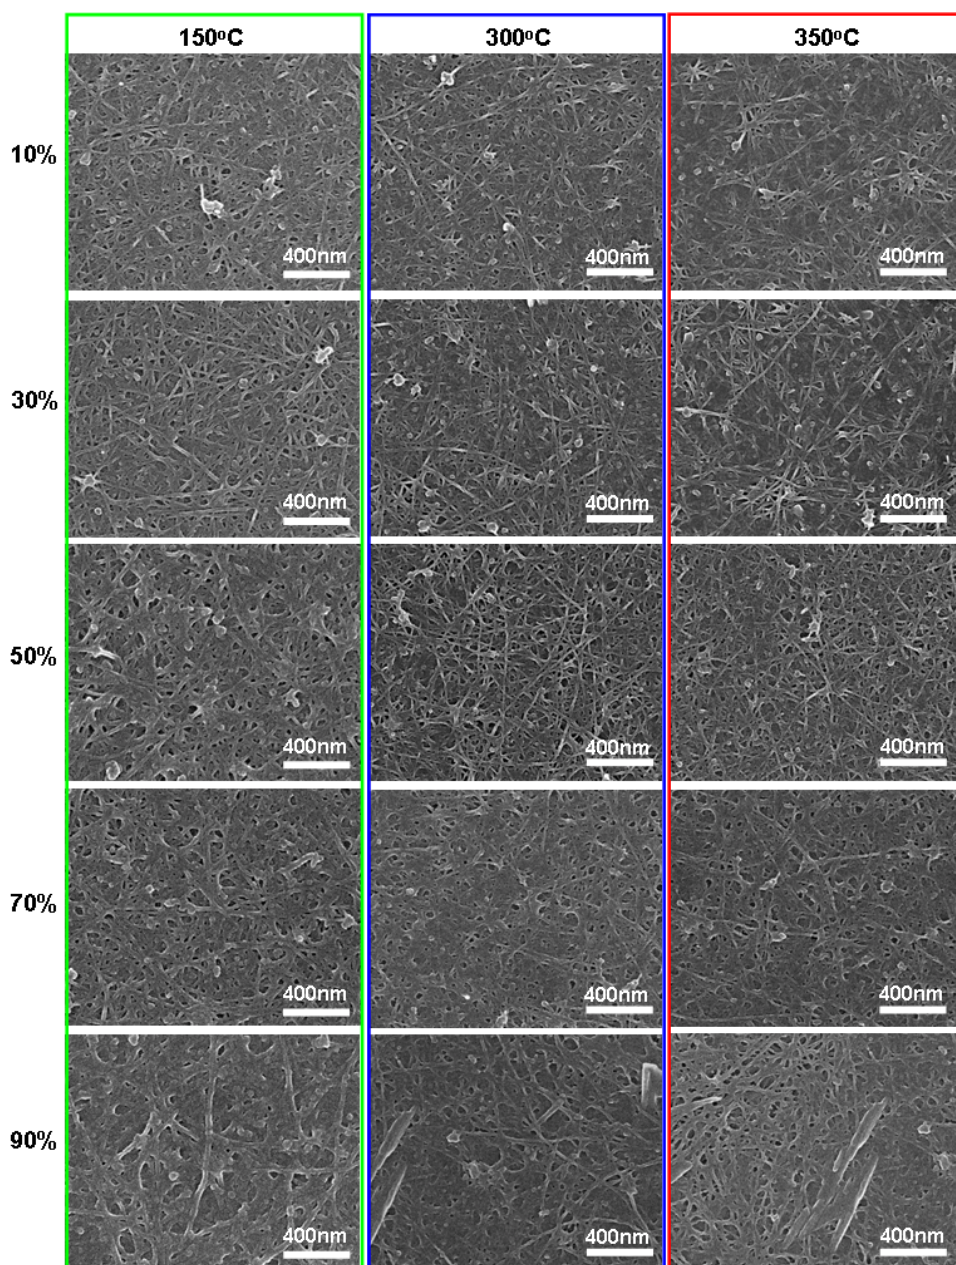

**Figure S3.** SEM images of P3/TIP-acac films having various amount of TIP baked at 150, 300, 350 °C.

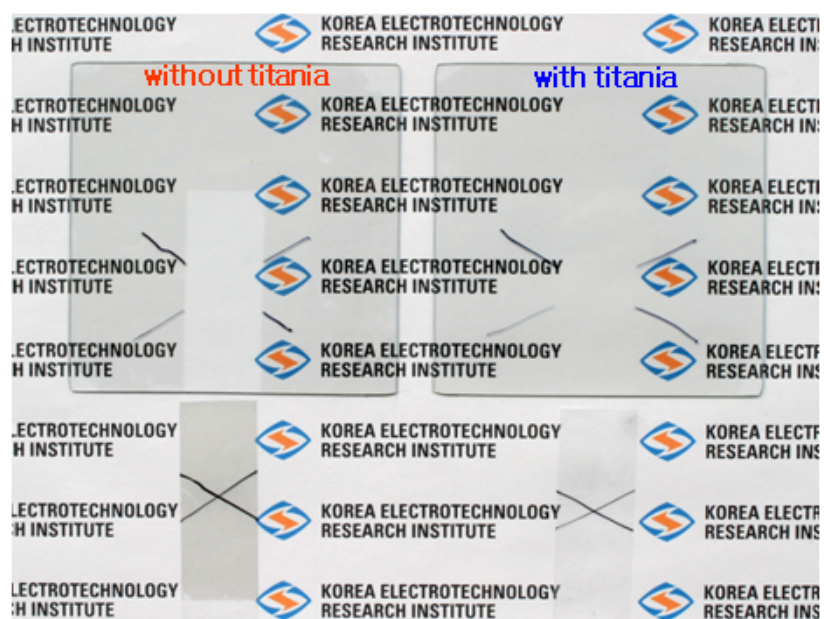

**Figure S4.** Photoimage of pristine P3 and titania-wrapped P3 thin films after taping test.

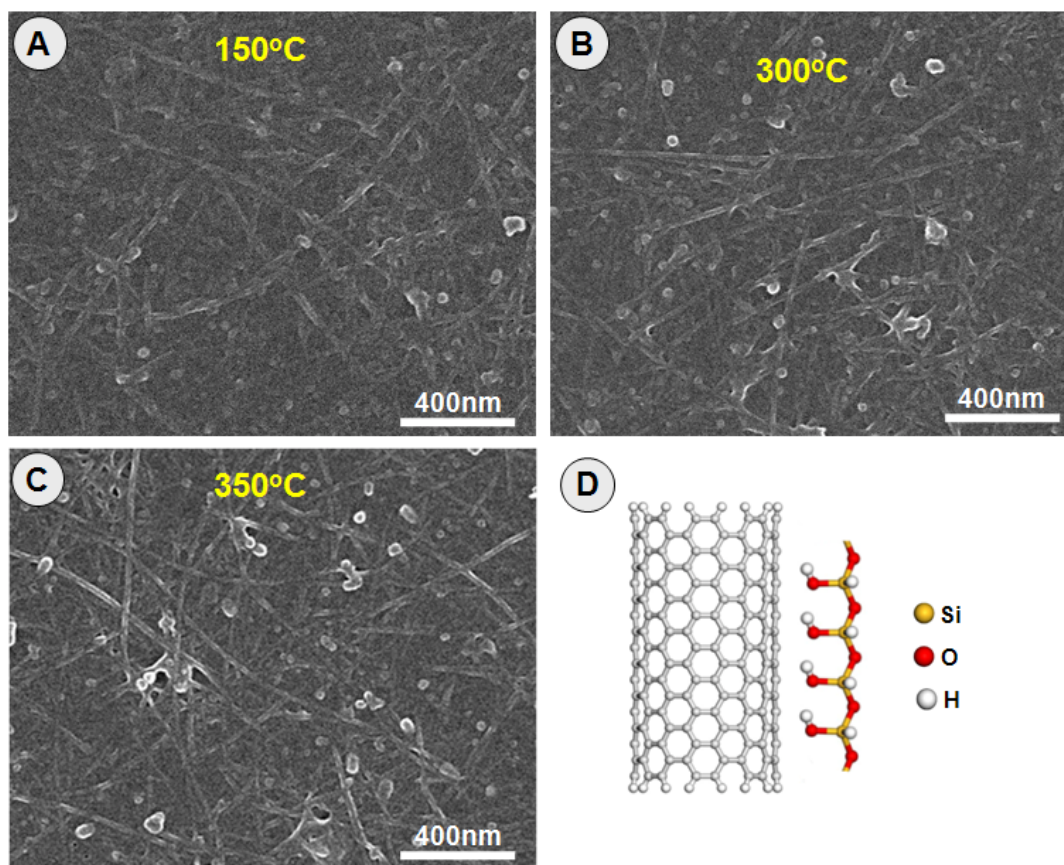

**Figure S5.** SEM images of P3/SiO<sub>2</sub> sol films with a 50wt% SiO<sub>2</sub> sol after baking at (a) 150 °C, (b) 300 °C, (c) 350 °C. (d) Chemical structure of the SWCNT and SiO<sub>2</sub> sol.

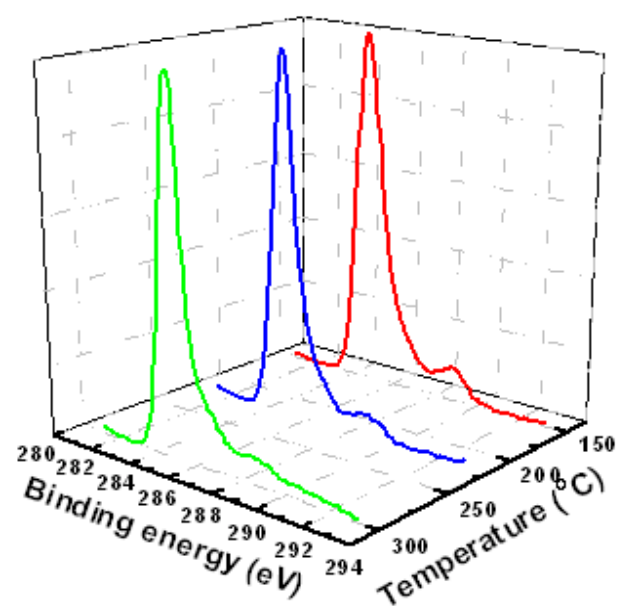

**Figure S6.** The C 1s peaks of pristine P3 film at selected temperature intervals obtained from XPS measurements.
